# Supplementary material for: Cerebrospinal fluid-contacting neuron tracing reveals structural and functional connectivity for locomotion in the mouse spinal cord
Source: eLife. 2023 Feb 21;12:e83108. doi: 10.7554/eLife.83108 (PMC9943067; doi:10.7554/eLife.83108)
Supplement: Figure 2—source data 1. [file elife-83108-fig2-data1.xlsx]

## Sheet: Sheet1
Figure 2 – source data
Figure 2H
	R-C (including all the traced cells)
	Cervical	Thoracic	Lumbar	Sacral	total
Rostral	76	109	94	35	314
Bidirectional	4	0	0	0	4
Caudal	7	0	1	6	14
Rostral	87.3563	100	98.9474	85.3659	94.5783
Bidirectional	4.5977	0	0	0	1.20482
Caudal	8.04598	0	1.05263	14.6341	4.21687
Figure 2I
	R-C Length							Collaterals to dorsal						Collaterals in ventral funiculus
	Cervical	Thoracic	Lumbar	Sacral				Cervical	Thoracic	Lumbar	Sacral			Cervical	Thoracic	Lumbar	Sacral
	2788	3436	2879	1360				8	1	2	0			0	0	2	0
	1251	3217	6852	7884				3	2	3	0			1	1	1	3
	1777	3168	6604	4182				5	2	0	1			1	1	5	3
	2925	2117	5370	5390				8	1	0	0			1	1	1	2
	3736	1962	3310	2493				3	0	0	0			1	0	1	3
	1330	1922	3323	4803				2	1	0	0			1	1	0	2
	1536	1659	5023	3341				1	0	0	0			0	1	2	1
	1625	2996	3032	655				0	1	0	0			0	1	2	2
	2125	2116	4976					2	2	1				0	0	10
	1163	2818	6856					0	7	0				0	2	7
	722	3422						2	5					0	5
	1771	3736						2	0					0	5
	1975	6051						4	3					0	4
	1696	3665						6	0					0	4
	1655	2633						3	4					1	2
	1479	4190						2	4					0	1
	993	2852						3	6					1	1
	1610	2377						5	2					0	2
	1409	1625						3	0					1	1
	1909	1913						5	1					1	1
	1730	2800						6	0					2	1
	1257	2654						4	0					1	1
	1986	3538						2	0					3	2
	3726	1452						8	0					0	2
	2042	2139						0	3					5	2
		2009							3						3
		3281							3						7
		3574							3						10
AV	1848.64	2832.93	4822.5	3763.5				3.48	1.92857	0.6	0.125			0.8	2.21429	3.1	2
SD	745.771	973.669	1609.36	2333.36				2.4	1.96127	1.07497	0.353553			1.1547	2.26662	3.21282	1.06904
SE	149.154	184.006	508.926	824.967				0.48	0.370644	0.339935	0.125			0.23094	0.428351	1.01598	0.377964
Ipsi- vs contralateral projections
Soma position	Cervical	Thoracic	Lumbar	Sacral	total	%
Dorso-lateral	2	2	0	0	4	5.6338
Ventral	23	26	10	8	67	94.3662
Total	25	28	10	8	71
Ventrally-projecting axons						%
Left	12	8	7	6	33	46.4789
Right	13	20	3	2	38	53.5211
Dorsally-projecting axons					total	%
ipsilateral	2	0	1	0	3	6.97674
bidirectional	14	13	0	0	27	62.7907
contralateral	1	2	1	0	4	9.30233
midline	4	3	1	1	9	20.9302
no dorsal collateral	4	9	7	7	27
