# Supplementary material for: Cerebrospinal fluid-contacting neuron tracing reveals structural and functional connectivity for locomotion in the mouse spinal cord
Source: eLife. 2023 Feb 21;12:e83108. doi: 10.7554/eLife.83108 (PMC9943067; doi:10.7554/eLife.83108)
Supplement: Figure 3—source data 1. [file elife-83108-fig3-data1.xlsx]

## Sheet: Sheet1
Figure 3 – source data 1
	AAV-Syn-DIO-mCherry in WT	AAV-Syn-DIO-mCherry in Pkd2l1-Cre
Olfactory bulb	±	–
Lateral ventricle	±	–
Choroid plexus	±	–
SFO	++	–
3rd ventricle	±~+ (tanycytes)	–
OVLT	++	–
Aq (PAG)	±~+	–
AP	++	–
Cerebellum	±	–
Spinal cord (CSF-cNs)	++	++
