# Supplementary material for: Cerebrospinal fluid-contacting neuron tracing reveals structural and functional connectivity for locomotion in the mouse spinal cord
Source: eLife. 2023 Feb 21;12:e83108. doi: 10.7554/eLife.83108 (PMC9943067; doi:10.7554/eLife.83108)
Supplement: Figure 7—source data 1. [file elife-83108-fig7-data1.xlsx]

## Sheet: Figure 7
Figure 7 – source data
Maximum treadmill speed (cm/s)
	Figure 7B				Figure 7G
	PKD2L1-Cre+AAV-DIO-hM4Di				WT+AAV-DIO-hM4Di
	Pre	+CNO			Pre	+CNO
	49.1667	25			45.5556	49.4444
	43.8889	36.3889			49.1667	57.2222
	38.3333	23.6111			42.7778	42.2222
	20.8333	15			42.2222	36.3889
	39.4444	34.4444			38.6111	40
	22.7778	15.2778			44.1667	42.5
	46.1111	42.2222			39.7222	30.5556
AV	37.2222	27.4206			43.1746	42.619
SD	11.1769	10.5747			3.56761	8.67191
SEM	4.22447	3.99685			1.34843	3.27768
Circular phase plot
	Figure 7C
	Forelimb				Hindlimb
	PKD2L1-Cre+AAV-DIO-hM4Di
	phi		r		phi		r
	Pre	+CNO	Pre	+CNO	Pre	+CNO	Pre	+CNO
	0.4953	0.515476	0.925361	0.961881	0.493319	0.490049	0.973216	0.985383
	0.484182	0.516685	0.887137	0.882329	0.48545	0.502981	0.966558	0.964937
	0.507265	0.487604	0.941243	0.93838	0.480194	0.486064	0.984948	0.972942
	0.492607	0.475729	0.934668	0.923018	0.468577	0.448735	0.970236	0.959231
	0.492632	0.476791	0.920432	0.912507	0.479568	0.473773	0.952955	0.950578
	0.478658	0.472898	0.899804	0.95631	0.483941	0.48524	0.977367	0.973147
	0.4634	0.486191	0.856326	0.885238	0.459027	0.494333	0.953972	0.921381
AV	0.48772	0.490196	0.909281	0.922809	0.478582	0.483025	0.968464	0.961085
SD	0.0139855	0.018492	0.0300926	0.0317485	0.0113955	0.0175643	0.0117678	0.0207427
SEM	0.00528602	0.00698933	0.0113739	0.0119998	0.00430708	0.00663868	0.00444783	0.00784
	Figure 7H
	Forelimb				Hindlimb
	WT+AAV-DIO-hM4Di
	phi		r		phi		r
	Pre	+CNO	Pre	+CNO	Pre	+CNO	Pre	+CNO
	0.521	0.526436	0.922116	0.907522	0.486647	0.488889	0.970455	0.979448
	0.503069	0.508762	0.907491	0.951393	0.498143	0.493171	0.965858	0.963578
	0.504091	0.503676	0.913682	0.915018	0.5185	0.528	0.971402	0.948052
	0.50196	0.516559	0.891681	0.966282	0.5202	0.506471	0.964002	0.980834
	0.467309	0.463414	0.945432	0.948094	0.47525	0.472436	0.95513	0.961404
	0.489773	0.483889	0.948153	0.955203	0.49166	0.494795	0.9441	0.934075
	0.518204	0.465551	0.942565	0.933152	0.510273	0.485625	0.952149	0.97073
AV	0.500772	0.495469	0.924446	0.939523	0.500096	0.495627	0.960442	0.962589
SD	0.0181268	0.0248479	0.0216529	0.0217617	0.0169294	0.0175858	0.0102181	0.0168824
SEM	0.00685129	0.00939161	0.00818404	0.00822515	0.00639872	0.00664682	0.00386209	0.00638094
Step frequency (Hz)
	Figure 7D			Figure 7I
Forelimb	PKD2L1-Cre+AAV-DIO-hM4Di			WT+AAV-DIO-hM4Di
	Pre	+CNO		Pre	+CNO
	4.23875	4.03456		4.11063	4.19946
	3.91266	3.59531		4.17244	4.09518
	3.8967	3.50522		3.91314	3.76079
	3.97283	3.79181		4.4581	3.79318
	3.61713	3.52539		3.95232	4.05204
	4.28055	3.66836		3.91622	3.92505
	3.95054	3.8972		3.89789	3.73999
AV	3.98131	3.71684		4.06011	3.93795
SD	0.224102	0.19902		0.205673	0.181578
SEM	0.0847026	0.0752225		0.077737	0.0686299
Hindlimb	PKD2L1-Cre+AAV-DIO-hM4Di			WT+AAV-DIO-hM4Di
	Frequency			Frequency
	Pre	+CNO		Pre	+CNO
	4.26671	4.0082		4.09749	4.10693
	4.00627	3.58882		4.10523	4.06959
	3.82327	3.51899		3.91215	3.77005
	3.94467	3.76451		4.41483	3.76547
	3.67858	3.47081		3.9267	3.90207
	4.11334	3.64802		3.97681	3.88804
	3.95681	3.87491		3.88754	3.65854
AV	3.96995	3.69632		4.04582	3.8801
SD	0.190251	0.195791		0.184497	0.164442
SEM	0.0719081	0.074002		0.0697333	0.0621533
Stride length (cm)
	Figure 7E			Figure 7J
Forelimb	PKD2L1-Cre+AAV-DIO-hM4Di			WT+AAV-DIO-hM4Di
	Pre	+CNO		Pre	+CNO
	5.47796	5.69636		5.72302	5.28378
	5.34279	6.4275		5.47464	5.53674
	5.61486	6.3902		5.93674	6.15371
	5.34937	5.85056		5.16769	6.24657
	6.05028	6.35756		5.73355	5.368
	5.24025	5.90633		5.69143	5.38891
	5.92757	5.9625		5.81571	6.15174
AV	5.57187	6.08443		5.64897	5.73278
SD	0.31038	0.299352		0.253993	0.429735
SEM	0.117313	0.113145		0.0960005	0.162425
Hindlimb	PKD2L1-Cre+AAV-DIO-hM4Di			WT+AAV-DIO-hM4Di
	Pre	+CNO		Pre	+CNO
	5.3696	5.5714		5.66435	5.30342
	5.67933	6.42559		5.50759	5.59043
	5.77686	6.3532		5.94089	6.13351
	5.55536	5.89698		5.2676	6.33343
	6.19789	6.56362		5.70344	5.59932
	5.39676	6.0058		5.60574	5.54314
	5.99795	5.99255		5.83545	6.13592
AV	5.71054	6.11559		5.64644	5.8056
SD	0.306668	0.347471		0.22002	0.388406
SEM	0.11591	0.131332		0.0831597	0.146804
Step length (cm)
	Figure 7F			Figure 7K
Forelimb	PKD2L1-Cre+AAV-DIO-hM4Di			WT+AAV-DIO-hM4Di
	Pre	+CNO		Pre	+CNO
	2.75843	2.85844		2.9625	2.92184
	2.43364	3.1255		2.735	2.8275
	2.65457	2.92373		3.09558	3.01194
	2.80063	2.72544		2.48509	3.32833
	2.8445	2.92022		2.64892	2.32508
	2.48581	2.854		2.87692	2.63846
	2.63605	2.80979		3.18193	2.83082
AV	2.65909	2.88816		2.85514	2.84057
SD	0.155822	0.124695		0.248495	0.311108
SEM	0.0588951	0.0471304		0.0939221	0.117588
Hindlimb	PKD2L1-Cre+AAV-DIO-hM4Di			WT+AAV-DIO-hM4Di
	Pre	+CNO		Pre	+CNO
	2.53	2.85773		2.74553	2.43325
	3.17646	3.55869		3.157	2.85979
	2.66632	3.00833		3.37043	3.34615
	2.72741	2.5583		2.74769	3.04057
	3.03683	3.22653		2.48116	2.41355
	2.44675	2.89593		2.56321	2.52396
	2.515	2.6502		2.705	2.8752
AV	2.72839	2.9651		2.82429	2.78464
SD	0.278079	0.342423		0.321756	0.347319
SEM	0.105104	0.129424		0.121612	0.131274
Average number of fault placements in the laddar walk test
	Figure 7L			Figure 7M
	PKD2L1-Cre+AAV-DIO-hM4Di			WT+AAV-DIO-hM4Di
	Pre	+CNO		Pre	+CNO
	2.66667	3		2	2.66667
	3	4.33333		3.33333	1
	3	4.66667		0.666667	1.66667
	1.66667	3.33333		0.333333	0.666667
	1.66667	4.33333		0.666667	1.66667
	0.666667	6		2.33333	2.66667
	1	3
AV	1.95238	4.09524		1.55556	1.72222
SD	0.95119	1.08379		1.18634	0.827759
SEM	0.359516	0.409635		0.484322	0.337931
Total number of slips in the beam walk test (5 runs)
	Figure 7O			Figure 7P
	PKD2L1-Cre+AAV-DIO-hM4Di			WT+AAV-DIO-hM4Di
	Pre	+CNO		Pre	+CNO
	1	1		1	1
	2	1		4	2
	0	4		3	2
	2	0		1	0
	2	3		1	0
	2	1		1	0
	1	2
AV	1.42857	1.71429		1.83333	0.833333
SD	0.786796	1.38013		1.32916	0.983192
SEM	0.297381	0.521641		0.542627	0.401386
